# Supplementary material for: A Scalable Synthesis of Ag Nanoporous Film As an Efficient SERS-Substrates for Sensitive Detection of Nanoplastics
Source: PubMed Central journal article supplement (PMC11340027; doi:10.1021/acs.langmuir.4c01671), 2024-08-05
Supplement: la4c01671_si_001.pdf [file la4c01671_si_001.pdf]

Supporting information for:

## **A scalable Synthesis of Ag Nanoporous film as an efficient SERS-Substrates for Sensitive Detection of Nanoplastics**

Rafael Villamil Carreón,<sup>†</sup> Ana G. Rodríguez-Hernández,<sup>‡</sup> Laura E. Serrano de la Rosa,<sup>Δ</sup> Ma. Estela Calixto,<sup>Δ</sup> J.J. Gervacio-Arciniega,<sup>\*</sup> # Siva Kumar Krishnan.<sup>§\*</sup>

<sup>†</sup>Facultad de Ciencias Físico Matemáticas, Benemérita Universidad Autónoma de Puebla, Av. San Claudio y Av. 18 sur., Puebla, Pue., C. P. 72570, México.

<sup>‡</sup>CONAHCyT-Centro de Nanociencias and Nanotecnología, Universidad Nacional Autónoma de México, Km 107 Carretera Tijuana-Ensenada Apdo Postal 14, CP. 22800 Ensenada, B.C. México.

<sup>Δ</sup>Instituto de Física, Benemérita Universidad Autónoma de Puebla, Av. San Claudio y Blvd. 18 Sur, Col. San Manuel, Ciudad Universitaria, Puebla, Pue 72570, México

<sup>#</sup>CONAHCyT- Facultad de Ciencias Físico Matemáticas, Benemérita Universidad Autónoma de Puebla, Apdo. Postal J-48, Puebla 72570, México.

<sup>§</sup>CONAHCyT- Instituto de Física, Benemérita Universidad Autónoma de Puebla, Av. San Claudio y Blvd. 18 Sur, Col. San Manuel, Ciudad Universitaria, Puebla, Pue 72570, México.

### **Corresponding authors:**

JJG: [jjgervacio@hotmail.com](mailto:jjgervacio@hotmail.com)

SKK: [sivakumar@ifuap.buap.mx](mailto:sivakumar@ifuap.buap.mx)

## **Table of content**

|                                                                                                                                                                       |     |
|-----------------------------------------------------------------------------------------------------------------------------------------------------------------------|-----|
| <b>Figure S1.</b> SEM images of Ag NPs films obtained by thermal evaporation of Ag onto DES-coated substrates with different pressure, and applied current.....       | S3. |
| <b>Figure S2.</b> The size distribution histogram of Ag NPs obtained at different deposition pressures.....                                                           | S4. |
| <b>Figure S3.</b> SEM and AFM topographical image of Ag film deposited over glass substrate without coating DES on it.....                                            | S5. |
| <b>Figure S4.</b> SEM images of Ag NPs films obtained using different types of DES components.....                                                                    | S5. |
| <b>Figure S5:</b> AFM topographic, line profile and corresponding pore size distribution histogram of the nanoporous Ag NP film obtained at low pressure.....         | S6. |
| <b>Figure S6.</b> AFM topographic images and corresponding line-profile and pore size distribution histogram of the Ag NPs films obtained at different pressures..... | S6. |
| <b>Figure S7.</b> Comparison of SERS Spectra of Ag-NPs film prepared under different pressures and applied currents and corresponding SERS EFs values.....            | S7. |
| <b>Figure S8.</b> Comparison of the SERS activity of CV ( $10^{-6}$ M) on nanoporous Ag NP substrate with Ag NP film and bare CV molecules on glass substrate.....    | S8. |
| <b>Figure S9.</b> SEM images and Dynamic light scattering (DLS) spectrum of PET nanoplastics particles dispersed in DI water.,.....                                   | S9. |

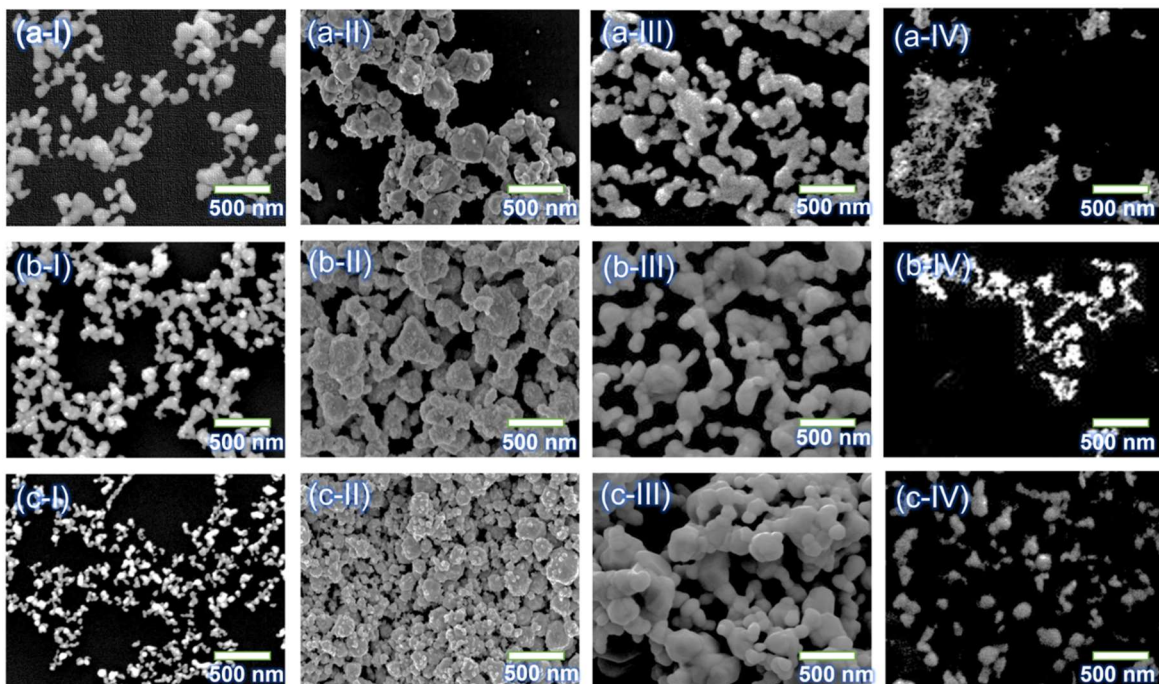

**Figure S1.** SEM images of Ag nanoparticles films obtained by thermal evaporation over DES (ChCl: U, ratio molar 1;2) with different pressures with P1 ((a-I) 2amps, (a-II) 4 amps, (a-III) 8 amps, (a-IV) 12 amps), P2 ((b-I) 2 amps, (b-II) 4 amps, (b-III) 8 amps, (b-IV) 12 amps), P3 ((c-I) 2 amps, (c-II) 4 amps, (c-III) 8 amps, (c-IV) 12 amps).

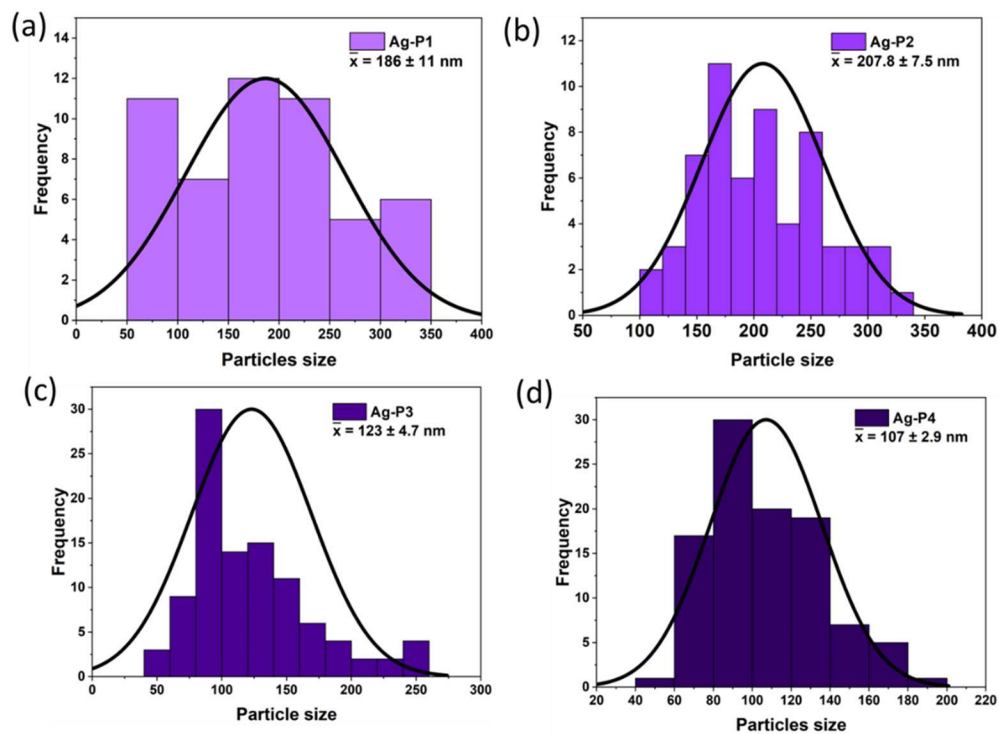

**Figure S2.** (a-d) Size distribution histogram of Ag NPs films obtained at different deposition pressures. To obtain the average particle size approximately 80-100 particles were counted.

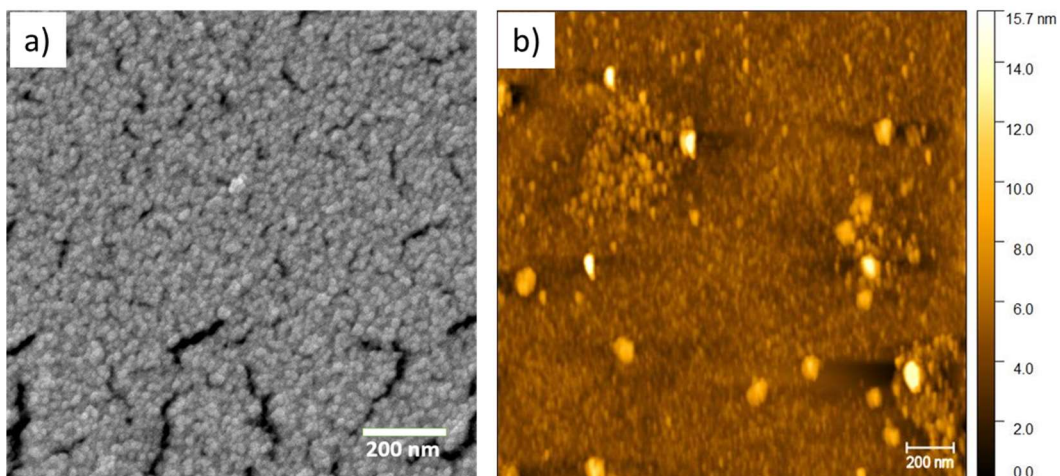

**Figure S3.** Morphological characterization of Ag films deposited over glass substrate without coating DES on it. a) SEM and b) AFM topographical image of Ag film.

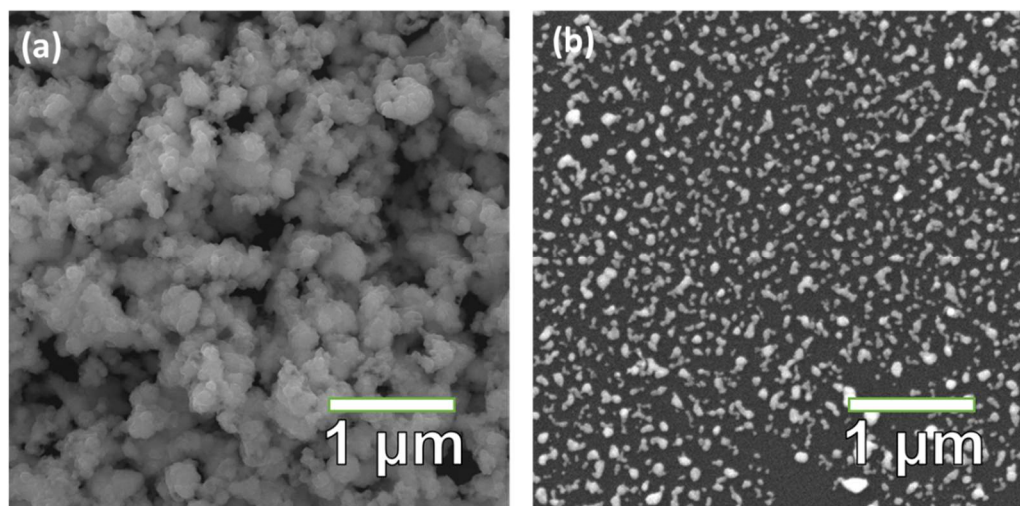

**Figure S4.** Typical SEM images of Ag NPs films obtained using (a) ChCl: malonic acid (molar ratio 1:1), (b) ChCl: Ethylene glycol (molar ratio of 1:4), coated substrates.

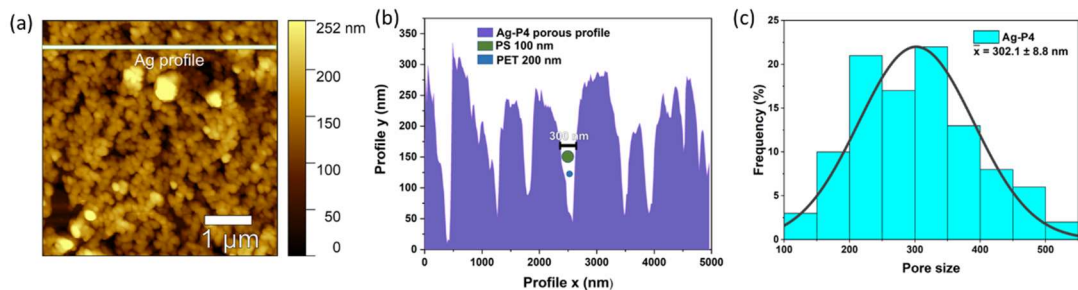

**Figure S5:** a) AFM topographic image of nanoporous Ag NPs film, b, c) Line profile and corresponding pore size distribution histogram of the nanoporous Ag NP film.

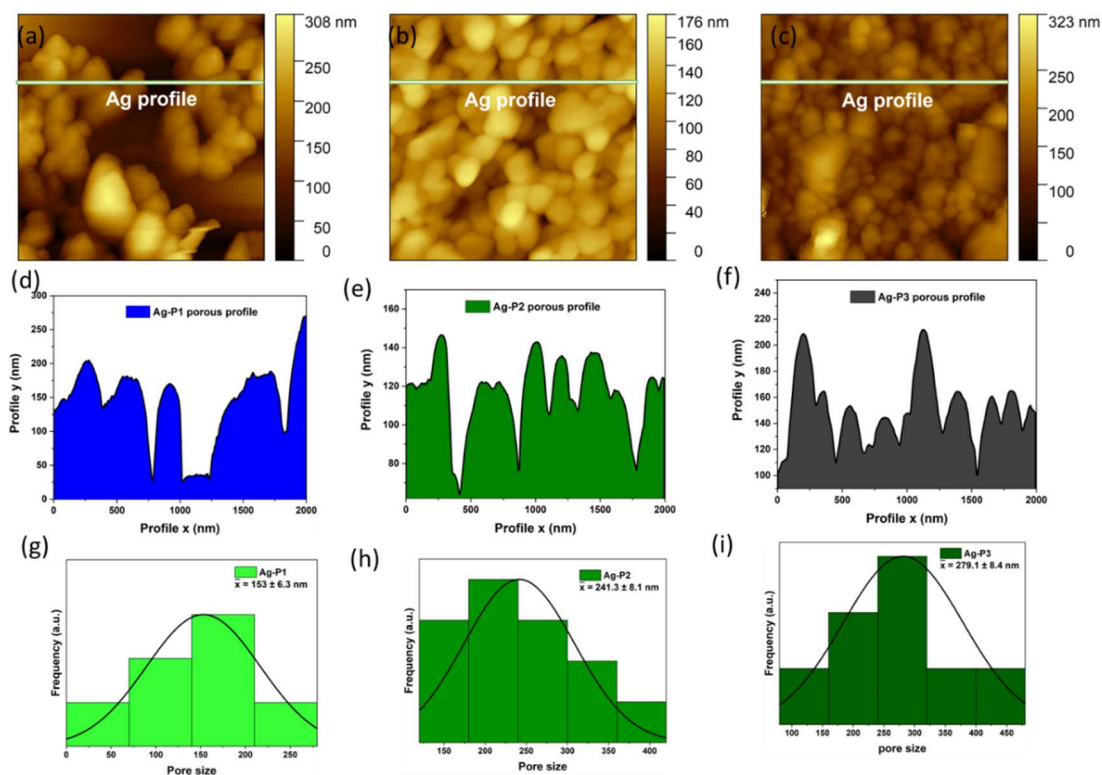

**Figure S6.** (a-c) AFM topographic images, (d-f) corresponding line profile and (g-i) pore size distribution histogram of the Ag NPs films obtained at different pressures (Ag-P1, Ag-P2, and Ag-P3 samples).

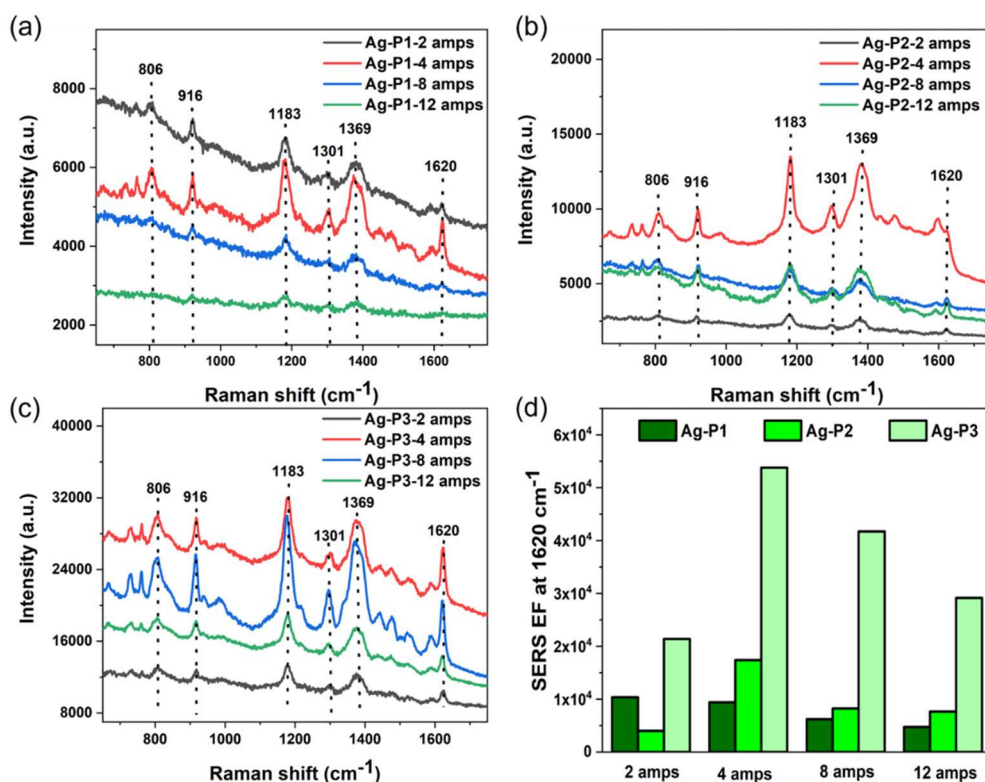

**Figure S7.** Comparison of SERS Spectra of Ag-NPs film prepared under different pressures and different currents. (a) Ag-P1, (b) Ag-P2, (c) Ag-P3, (d) Comparison of enhancement factors (EFs) of the SERS substrates obtained under different pressures using different deposition currents.

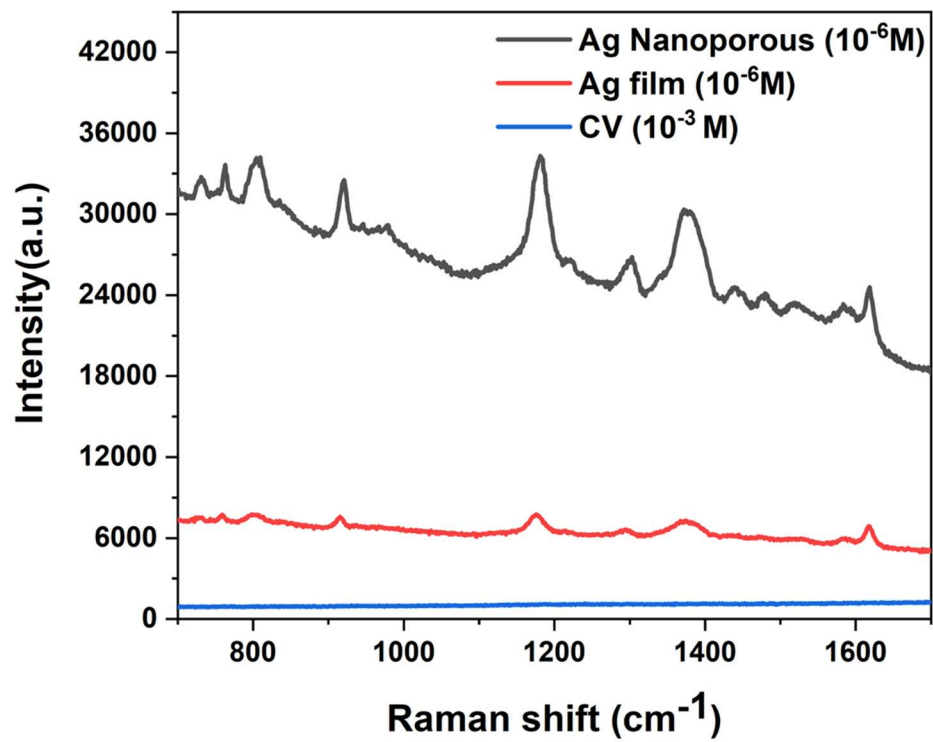

**Figure S8.** Comparison of the SERS spectra of CV ( $10^{-6}$  M) on nanoporous Ag NP substrate with bare Ag NP film and bare CV molecules on glass substrate, respectively.



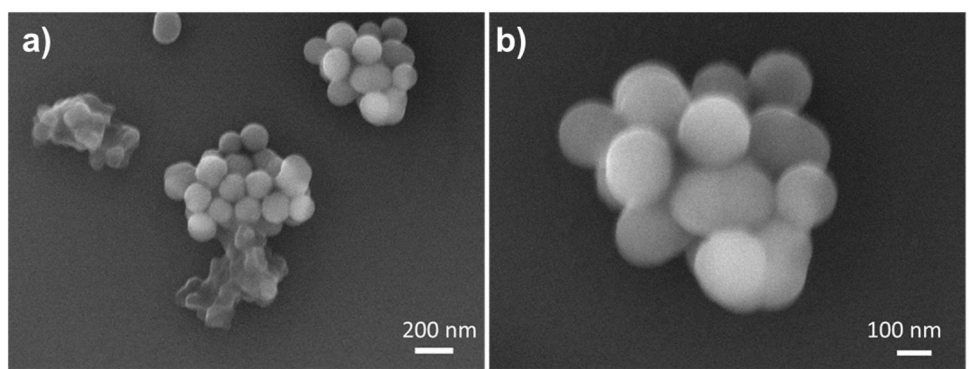

Size Distribution by Volume

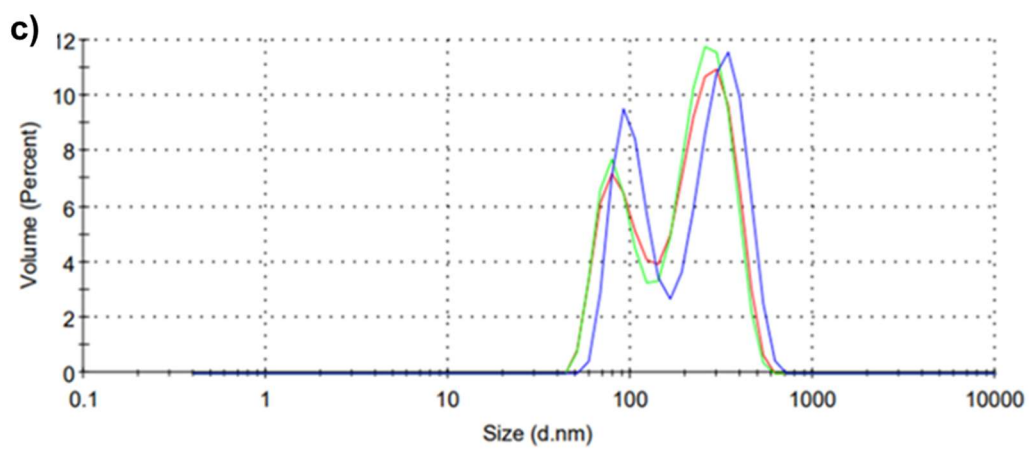

**Figure S9.** Characterization of PET nanoplastics particles. (a, b) SEM images of PET nanoplastics particles, (c) Dynamic Light scattering (DLS) spectrum of PET Nanoplastics particles dispersed in DI water.
